# Supplementary material for: Elastic modulus of β-Ga2O3 nanowires measured by resonance and three-point bending techniques
Source: publisher site journal article supplement (doi:10.3762/bjnano.15.58), 2024-06-18
Supplement: Additional file 1 [file 2190-4286-15-58-S1.pdf]

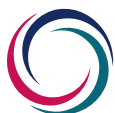

## Supporting Information

for

### **Elastic modulus of $\beta$ -Ga<sub>2</sub>O<sub>3</sub> nanowires measured by resonance and three-point bending techniques**

Annamarija Trausa, Sven Oras, Sergei Vlassov, Mikk Antsov, Tauno Tiirats, Andreas Kyritsakis, Boris Polyakov and Edgars Butanovs

*Beilstein J. Nanotechnol.* **2024**, *15*, 704–712. [doi:10.3762/bjnano.15.58](https://doi.org/10.3762/bjnano.15.58)

## Additional results

Table S1 displays values obtained from mechanical resonance experiments conducted in a scanning electron microscope (SEM) for  $\beta$ -Ga<sub>2</sub>O<sub>3</sub> nanowires (NWs). It includes dimensions of the NWs, resonance frequencies, and the corresponding calculated elastic modulus values.

**Table S1:** Mechanical resonance experiments in SEM.

|    | <b>Length (<math>\mu\text{m}</math>)</b> | <b>Width (nm)</b> | <b>Resonance frequency (kHz) (n=1)</b> | <b>Elastic modulus (GPa)</b> |
|----|------------------------------------------|-------------------|----------------------------------------|------------------------------|
| 1  | 13.578                                   | 50.572            | 132.20                                 | <b>57.3</b>                  |
| 2  | 10.100                                   | 80.650            | 149.62                                 | <b>8.8</b>                   |
| 3  | 6.016                                    | 77.397            | 669.46                                 | <b>24.2</b>                  |
| 4  | 14.045                                   | 103.432           | 126.26                                 | <b>14.3</b>                  |
| 5  | 13.230                                   | 102.795           | 126.75                                 | <b>11.5</b>                  |
| 6  | 26.900                                   | 70.520            | 32.56                                  | <b>27.6</b>                  |
| 7  | 8.845                                    | 78.302            | 263.13                                 | <b>17.1</b>                  |
| 8  | 15.384                                   | 182.415           | 283.01                                 | <b>33.3</b>                  |
| 9  | 16.570                                   | 56.310            | 90.08                                  | <b>47.6</b>                  |
| 10 | 12.618                                   | 81.660            | 196.11                                 | <b>36.1</b>                  |
| 11 | 8.587                                    | 76.840            | 577.63                                 | <b>75.8</b>                  |
| 12 | 12.618                                   | 81.390            | 186.50                                 | <b>32.9</b>                  |
| 13 | 9.830                                    | 48.770            | 125.16                                 | <b>15.2</b>                  |
| 14 | 16.550                                   | 50.640            | 42.34                                  | <b>12.9</b>                  |
| 15 | 6.720                                    | 60.000            | 769.84                                 | <b>82.9</b>                  |
| 16 | 15.900                                   | 89.760            | 178.60                                 | <b>62.5</b>                  |
| 17 | 16.090                                   | 165.410           | 213.11                                 | <b>27.5</b>                  |

|    |        |         |        |             |
|----|--------|---------|--------|-------------|
| 18 | 12.210 | 63.280  | 72.00  | <b>7.1</b>  |
| 19 | 22.280 | 103.590 | 110.73 | <b>69.5</b> |
| 20 | 15.950 | 103.330 | 240.20 | <b>86.3</b> |
| 21 | 7.750  | 89.250  | 250.85 | <b>7.0</b>  |
| 22 | 19.560 | 101.320 | 92.58  | <b>30.2</b> |
| 23 | 16.450 | 118.870 | 208.79 | <b>55.8</b> |
| 24 | 18.500 | 122.780 | 46.82  | <b>4.2</b>  |
| 25 | 8.670  | 91.270  | 389.40 | <b>25.4</b> |
| 26 | 11.440 | 75.900  | 180.72 | <b>24.0</b> |

Table S2 presents data derived from mechanical resonance experiments performed in SEM for  $\beta$ -Ga<sub>2</sub>O<sub>3</sub> NWs. The table distinguishes between two sets of experiments: those where NWs are welded with Pt in SEM and those that are not. The values include dimensions of NWs and resonance frequencies, providing a comparative analysis of the mechanical properties of  $\beta$ -Ga<sub>2</sub>O<sub>3</sub> nanowires with and without Pt welding in the SEM environment.

**Table S2:** Mechanical resonance experiments in SEM with and without Pt welding.

|   | <b>Length<br/>(<math>\mu</math>m)</b> | <b>Width (nm)</b> | <b>Resonance<br/>frequency<br/>(kHz)<br/>(n=1)<br/>before welding</b> | <b>Resonance<br/>frequency<br/>(kHz)<br/>(n=1)<br/>after welding</b> |
|---|---------------------------------------|-------------------|-----------------------------------------------------------------------|----------------------------------------------------------------------|
| 1 | 6.016                                 | 77.397            | 669.46                                                                | 690.53                                                               |
| 2 | 13.230                                | 102.795           | 126.75                                                                | 129.98                                                               |
| 3 | 8.845                                 | 78.302            | 263.13                                                                | 265.29                                                               |

|   |        |         |        |        |
|---|--------|---------|--------|--------|
| 4 | 15.384 | 182.415 | 283.01 | 284.30 |
| 5 | 12.618 | 81.660  | 196.11 | 191.00 |
| 6 | 7.750  | 89.250  | 250.85 | 264.60 |
| 7 | 19.560 | 101.320 | 92.58  | 94.90  |

In Table S3, the nanowire dimensions (length, width and height) are included providing a detailed characterization of the physical attributes of the  $\beta$ -Ga<sub>2</sub>O<sub>3</sub> nanowires. The corresponding average of elastic modulus values, determined through three-point bending tests in an atomic force microscope (AFM) are shown as well as. The moment of inertia for each measured NW is also calculated and included.

**Table S3:** Three-point bending experiments in AFM.

|   | <b>Length<br/>(nm)</b> | <b>Width<br/>(nm)</b> | <b>Height<br/>(nm)</b> | <b>Moment of inertia<br/>(nm<sup>4</sup>)</b> | <b>Average elastic<br/>modulus (GPa)</b> |
|---|------------------------|-----------------------|------------------------|-----------------------------------------------|------------------------------------------|
| 1 | 2092.0                 | 114.00                | 34.29                  | 95517                                         | 128.70                                   |
| 2 | 2041.0                 | 94.50                 | 22.08                  | 78265                                         | 104.60                                   |
| 3 | 2431.0                 | 50.90                 | 67.17                  | 2514053                                       | 43.56                                    |
| 4 | 1248.5                 | 44.93                 | 54.00                  | 730586                                        | 26.65                                    |
| 5 | 2379.5                 | 121.37                | 82.83                  | 4182029                                       | 63.96                                    |
| 6 | 1951.0                 | 120.23                | 27.83                  | 30546                                         | 143.88                                   |
| 7 | 1780.0                 | 83.67                 | 79.17                  | 4281816                                       | 12.93                                    |
| 8 | 1486.0                 | 68.60                 | 47.33                  | 606239                                        | 82.51                                    |

Figure S1 presents SEM images of Ga<sub>2</sub>O<sub>3</sub> NWs with distinct cross-sections, notably a trapezoid (a) and rectangular shapes (b, c). These images illustrate the nonuniformity in the cross-sectional geometry of the NWs.

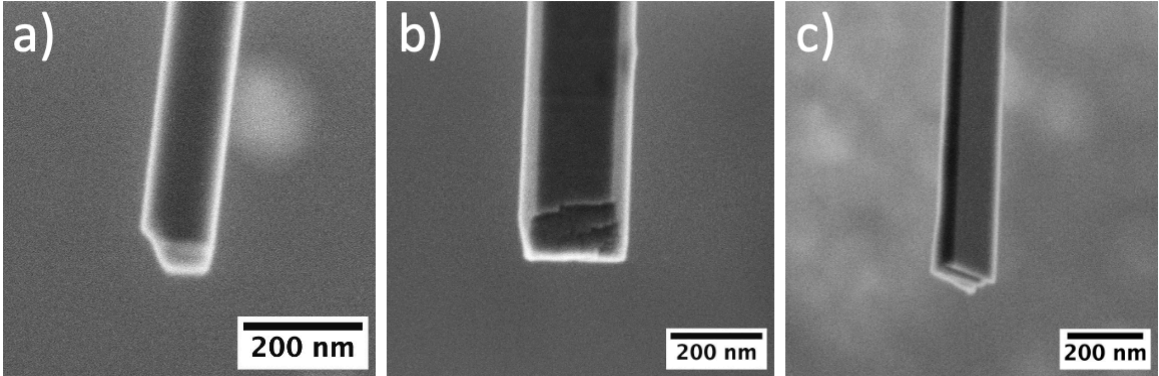

**Figure S1:** SEM images of Ga<sub>2</sub>O<sub>3</sub> NWs with different cross-sections: a) trapezoid; b) and c) rectangular.

Figure S2 provides a schematic representation of a β-Ga<sub>2</sub>O<sub>3</sub> NW positioned over an etched inverted pyramid on a Si substrate. The figure includes profile measurements obtained through AFM for a single NW. Notably, the height profile of the specific nanowire exhibits a variation, starting slightly above 20 nm at one end and increasing to 80 nm at the other end.

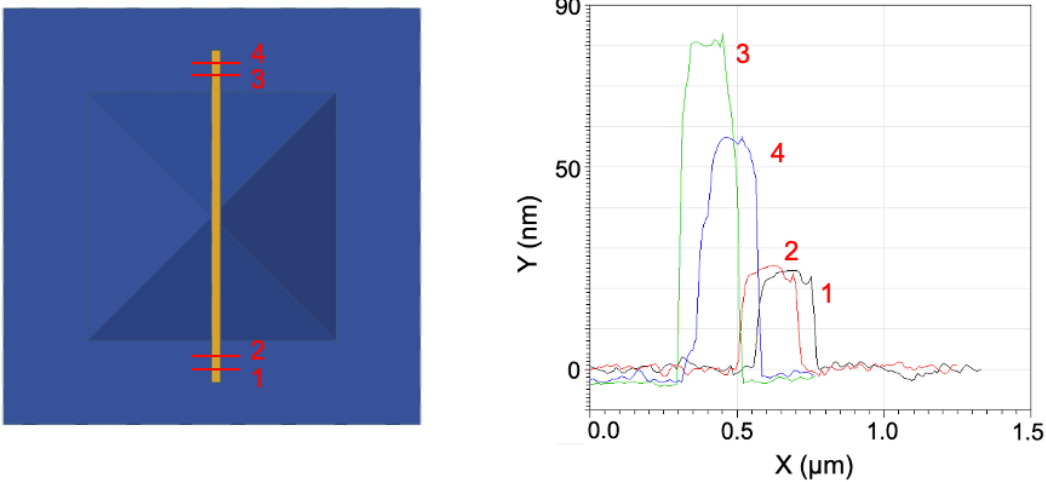

**Figure S2:** Height profiles of Ga<sub>2</sub>O<sub>3</sub> NW.

Figure S3 displays the histogram of elastic modulus values obtained using two methods: the resonance method and the three-point bending method showing the frequency of elastic modulus values.

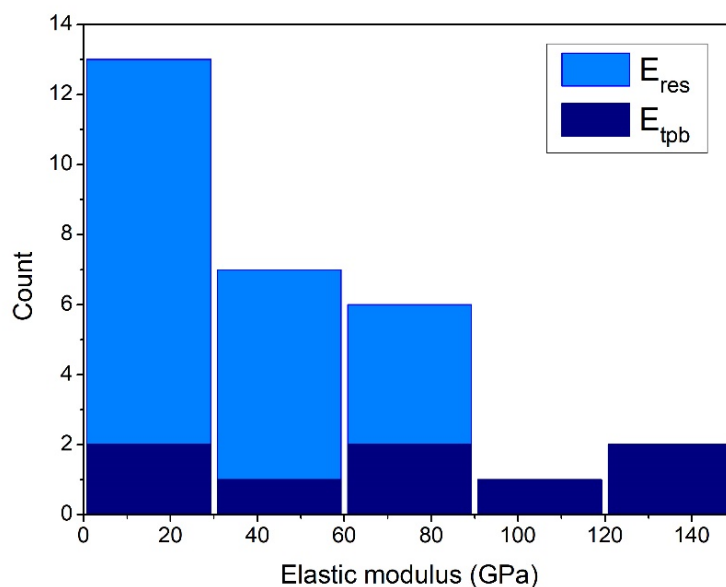

**Figure S3:** Histogram of elastic modulus values.

**Table S4:** Cross-section error in resonance experiments in SEM.

| NW width variation (nm) | 50 nm width                              |                                          | 100 nm width                             |                                          | 150 nm width                             |                                          |
|-------------------------|------------------------------------------|------------------------------------------|------------------------------------------|------------------------------------------|------------------------------------------|------------------------------------------|
|                         | Elastic modulus from minimal width (GPa) | Elastic modulus from maximal width (GPa) | Elastic modulus from minimal width (GPa) | Elastic modulus from maximal width (GPa) | Elastic modulus from minimal width (GPa) | Elastic modulus from maximal width (GPa) |
| 0                       | 34.7                                     | 34.7                                     | 34.7                                     | 34.7                                     | 34.7                                     | 34.7                                     |
| ± 1                     | 36.2                                     | 33.4                                     | 35.5                                     | 34.1                                     | 35.2                                     | 34.3                                     |
| ± 5                     | 42.9                                     | 28.7                                     | 38.5                                     | 31.5                                     | 37.2                                     | 32.5                                     |
| ± 10                    | 54.3                                     | 24.1                                     | 42.9                                     | 28.7                                     | 39.9                                     | 30.5                                     |
| ± 20                    | 96.5                                     | 17.7                                     | 54.3                                     | 24.1                                     | 46.3                                     | 27.1                                     |
| ± 30                    | 217.2                                    | 13.6                                     | 70.9                                     | 20.6                                     | 54.3                                     | 24.1                                     |

**Table S5:** Cross-section error in three-point bending experiments in AFM.

| NW width variation (nm) | 50 nm height                              |                                           | 100 nm height                             |                                           | 150 nm height                             |                                           |
|-------------------------|-------------------------------------------|-------------------------------------------|-------------------------------------------|-------------------------------------------|-------------------------------------------|-------------------------------------------|
|                         | Elastic modulus from minimal height (GPa) | Elastic modulus from maximal height (GPa) | Elastic modulus from minimal height (GPa) | Elastic modulus from maximal height (GPa) | Elastic modulus from minimal height (GPa) | Elastic modulus from maximal height (GPa) |
| 0                       | 76.0                                      | 76.0                                      | 76.0                                      | 76.0                                      | 76.0                                      | 76.0                                      |
| ± 1                     | 82.4                                      | 70.2                                      | 79.1                                      | 73.0                                      | 78.1                                      | 74.1                                      |
| ± 5                     | 115.8                                     | 51.9                                      | 93.3                                      | 62.5                                      | 87.1                                      | 66.7                                      |
| ± 10                    | 185.5                                     | 36.7                                      | 115.8                                     | 51.9                                      | 100.2                                     | 58.7                                      |
| ± 20                    | 586.4                                     | 19.8                                      | 185.5                                     | 36.7                                      | 134.8                                     | 46.1                                      |
| ± 30                    | 2968.8                                    | 11.6                                      | 316.5                                     | 26.6                                      | 185.7                                     | 36.7                                      |

In Table S4 and Table S5, minimal and maximal values of variations of geometry included in the elastic modulus calculation are shown. As depicted in Figure S2, NW profiles exhibit a nonconstant geometry, fluctuating within a 60 nm range, as illustrated in Figure S2. This variability, such as height ranging from 20 to 80 nm, poses challenges in accurately determining the geometry of the NW within the whole length of the NW. Despite the precision of both SEM and AFM measurements, our analysis suggests that the primary source of error stems from the nonconstant cross-sectional geometry of the NW. Variations of elastic modulus depending on variations of width in SEM resonance experiments are shown in Figure S4(a–c) and for variations of height in AFM three-point bending experiments are shown in Figure S4(d–f).

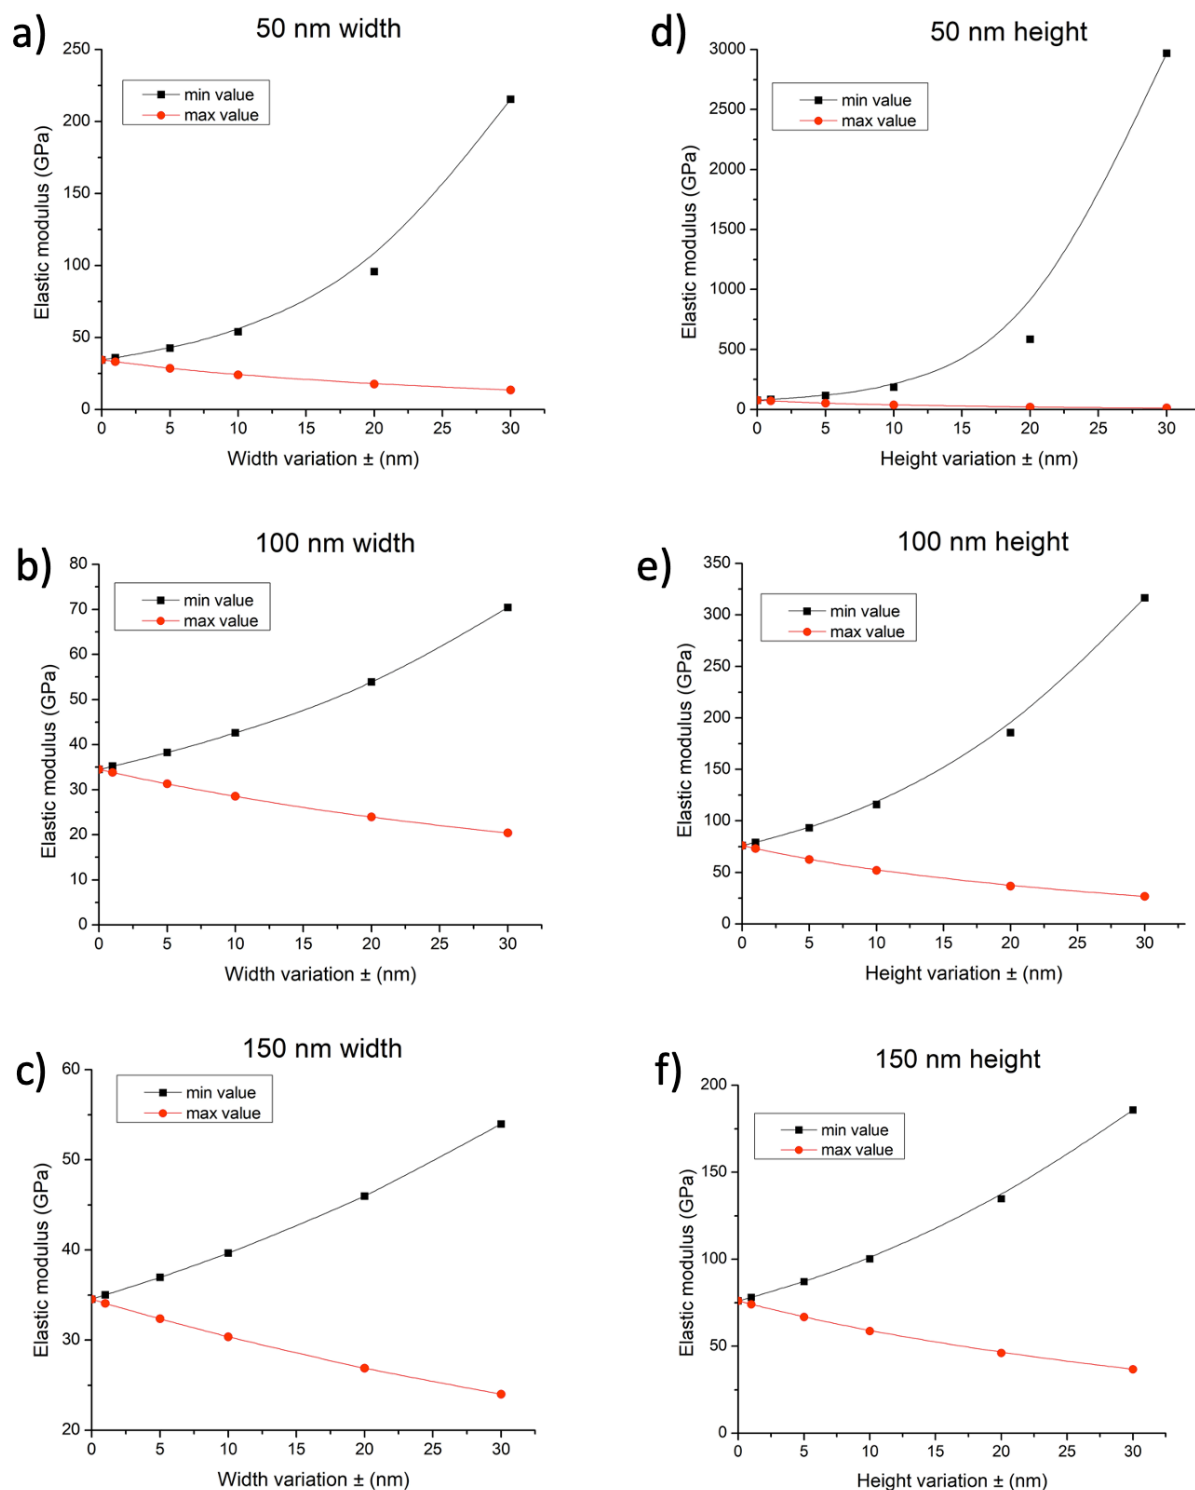

**Figure S4:** Graphs representing cross-section error. Variations of width in SEM resonance experiments are shown in (a–c), and for variations of height in AFM three-point bending experiments are shown in (d–f). Elastic modulus values, derived from the minimal and maximal values of width and height, are labelled as "min value" and "max value", respectively. Lines in graphs are drawn to guide the eye.
